# Supplementary material
Source: Springer Nature journal article supplement (https://www.springermedizin.de/resource/supplementary/12888_2013_1486_MOESM2_ESM.pdf/9480500)
Supplement: MOESM2 [file 9480500]

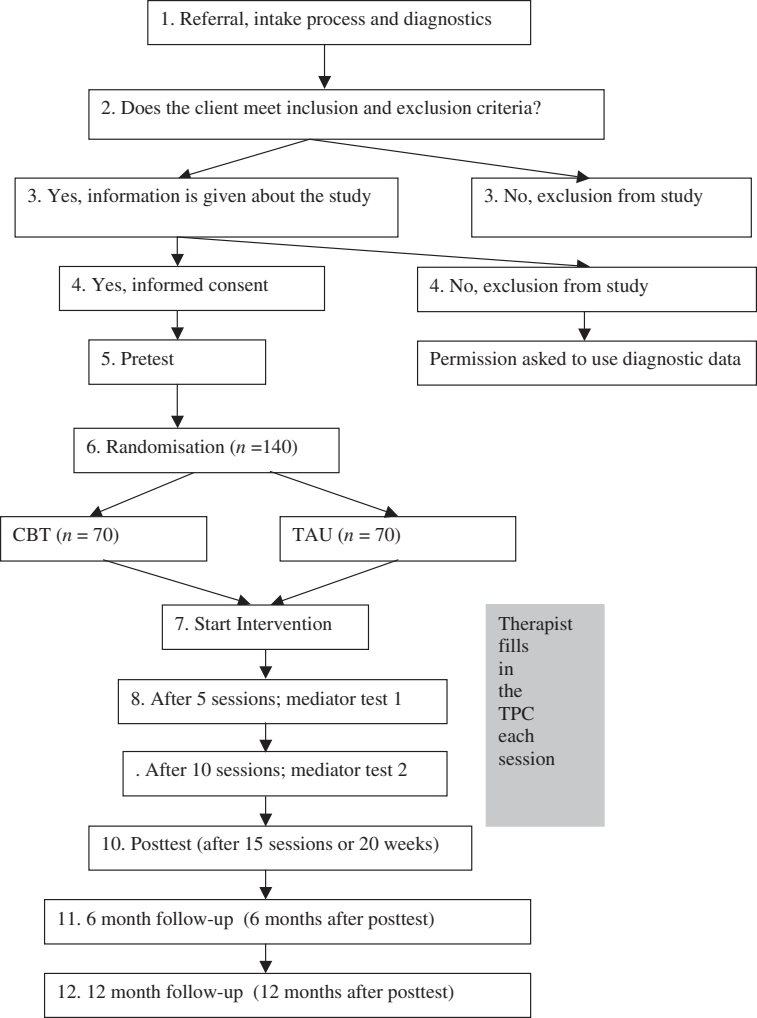

1. Referral, intake process and diagnostics

2. Does the client meet inclusion and exclusion criteria?

3. Yes, information is given about the study

3. No, exclusion from study

4. Yes, informed consent

4. No, exclusion from study

5. Pretest

Permission asked to use diagnostic data

6. Randomisation (n = 140)

CBT (n = 70)

TAU (n = 70)

7. Start Intervention

8. After 5 sessions; mediator test 1

. After 10 sessions; mediator test 2

10. Posttest (after 15 sessions or 20 weeks)

Therapist  
fills  
in  
the  
TPC  
each  
session

11. 6 month follow-up (6 months after posttest)

12. 12 month follow-up (12 months after posttest)
